# Supplementary material for: Porous honeycomb-like NiSe2/red phosphorus heteroarchitectures for photocatalytic hydrogen production
Source: Royal Society of Chemistry journal article supplement (doi:10.1039/c9nr09757k), 2020-01-01
Supplement: c9nr09757k1.pdf [file c9nr09757k1.pdf]

## Supplementary material

### **Porous honeycomb-like NiSe<sub>2</sub>/red phosphorus heteroarchitectures for photocatalytic hydrogen production**

Jia Jia<sup>a</sup>, Xue Bai<sup>a,b</sup>, Qiqi Zhang<sup>a</sup>, Xiaoyun Hu<sup>c</sup>, Enzhou Liu<sup>a,\*</sup>, Jun Fan<sup>a,\*</sup>

<sup>a</sup>School of Chemical Engineering, Northwest University, Xi'an 710069, P. R. China.

<sup>b</sup>College of Chemistry and Material, Northwest University, Xi'an 710069, P. R. China.

<sup>c</sup>School of Physics, Northwest University, Xi'an 710069, P. R. China.

\*Corresponding author. Tel.: +86 29 88303679; fax: +86 29 88302223.

E-mail address: fanjun@nwu.edu.cn; liuenzhou@nwu.edu.cn

### **Preparation of NiS/RP Composite**

The detailed synthetic process of NiS/RP composite was as follow: First, 19.26 mg of Ni(acac)<sub>2</sub> (Nickel(II) acetylacetonate, Macklin) and 0.2 g of nano RP were added into 50 mL three-neck flask containing a mixed solution of OLA (10 mL, oleylamine), OA (0.25 mL, oleic acid) and ODE (15 mL, 1-octadecene), and to acquire an uniform suspension solution with the aid of continuous stirring and nitrogen flowing atmosphere (Solution A). After stirring for 30 min, the above solution was quickly preheated up to 175 °C. Subsequently, 800 μL of DT (1-dodecanethiol) solution was rapidly added into Solution A and held for 30 min to obtain a lot of black product, suggesting the synthesis of NiS/RP composite. Finally, the formed precipitate was centrifuged and washed with several times using the chloroform and ethanol solution in order to dislodge residual solvent, and then dried at 45 °C for 6 h under nitrogen flowing atmosphere. At the same time, this sample was marked as 8.1% NiS/RP. For comparison, the y<sub>2</sub>%-NiS/RP (y<sub>2</sub>= 2.7, 5.4, and 10.7) were prepared via a similar synthetic method (y<sub>2</sub> represents theoretical adding amount of NiS).

### **Preparation of NiS/RP Composite**

The detailed synthetic process of FeS/RP composite was as follow: First, 16.60 mg of Fe(acac)<sub>3</sub> (Iron(III) acetylacetonate, Macklin) and 0.2 g of nano RP were added into 50 mL three-neck flask containing a mixed solution of OLA (10 mL, oleylamine), OA (0.25 mL, oleic acid) and ODE (15 mL, 1-octadecene), and to acquire an uniform suspension solution with the aid of continuous stirring and nitrogen flowing atmosphere (Solution A). After stirring for 30 min, the above solution was quickly preheated up to 175 °C. Subsequently, 800 μL of DT (1-dodecanethiol) solution was rapidly added into Solution A and held for 30 min to obtain a lot of black product, suggesting the synthesis of FeS/RP composite. Finally, the formed precipitate was centrifuged and washed with several times using the chloroform and ethanol solution in order to dislodge residual solvent, and then dried at 45 °C for 6 h under nitrogen flowing atmosphere. At the same time, this sample was marked as 5.3% NiS/RP. For comparison, the y<sub>3</sub>%-FeS/RP (y<sub>2</sub>= 2.6, 8.0, and 10.6) were prepared via a similar synthetic method (y<sub>3</sub> represents theoretical adding amount of FeS).

### **Photoelectrochemical characterization**

A series of photoelectrochemical measurements, for example Mott-Schottky plots (from -0.6 V to 1.0 V vs. SCE), electrochemical impedance spectra (at 0.5 V bias potential vs. SCE, frequency range from 0.01 to 10<sup>5</sup> Hz), linear sweep voltammetry (from 0.0 V to 0.7 V vs. SCE), transient photocurrent

(at 0.5 V bias potential vs. SCE) and HER polarization curves (from -1.0 V to 0.0 V vs. SCE), were analyzed on the CHI660E electrochemical workstation under 300 W Xe lamp, of which the counter electrode, reference electrode and working electrode were Pt, saturated calomel electrode (SCE) and photoanode. The irradiation area and electrolyte solution were 0.785 cm<sup>2</sup> and 0.5 M Na<sub>2</sub>SO<sub>4</sub> solution (pH = 7.0), respectively. In addition, the photoanode was synthesized according to the following methods: 5 mg of catalyst was dispersed into a mixed solution of ethanol/water (1 mL and the volume ratio is 1:1) and treated several times in ultrasound. Subsequently, the above suspension solution was directly dripped onto the FTO conductive glass surface by a disposable dropping pipette and then drying at 30 °C for all night.

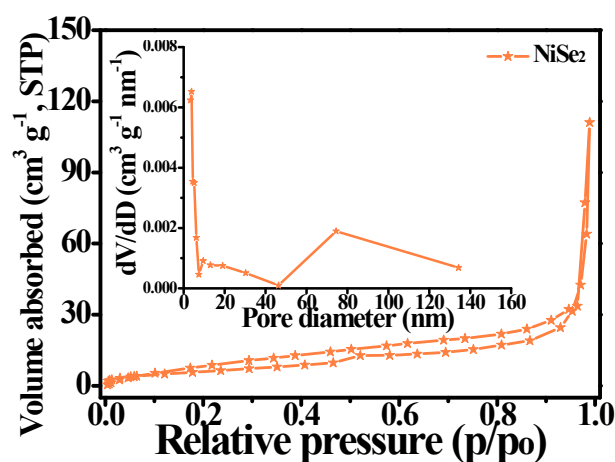

**Fig. S1** N<sub>2</sub> adsorption-desorption isotherms and pore size distribution plots of pristine NiSe<sub>2</sub>.

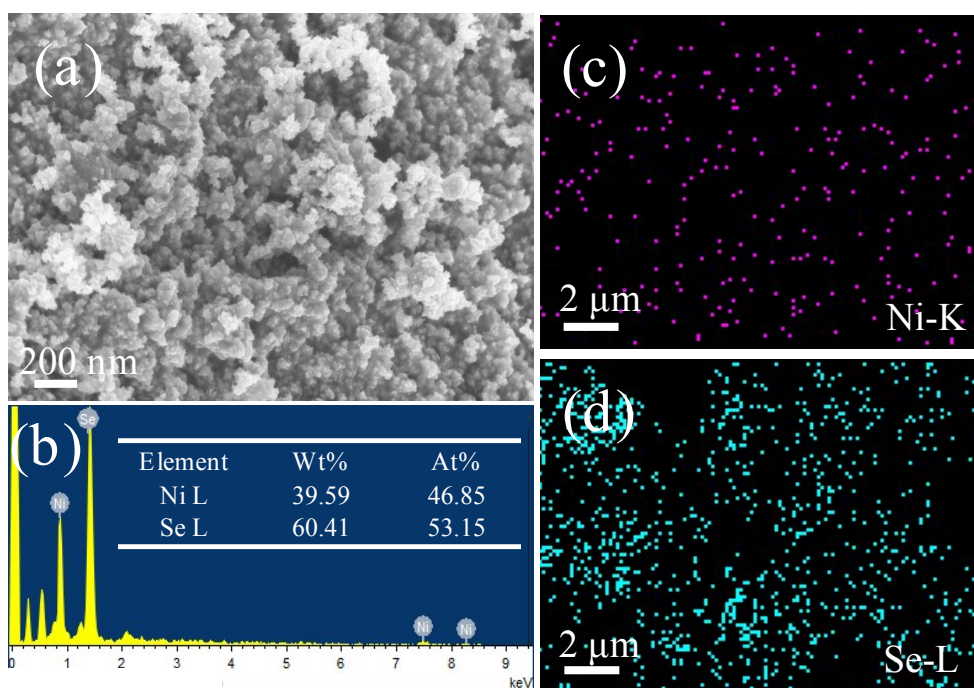

**Fig. S2** The (a) SEM, (b) EDS and (c, d) EDS Mapping of as-prepared NiSe<sub>2</sub> samples.

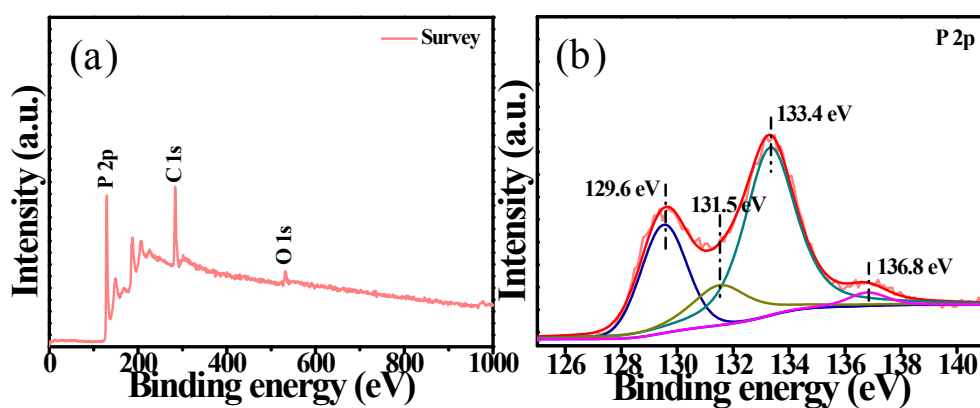

Fig. S3 (a) XPS survey and (b) high resolution XPS spectrum of P 2p for pure RP.

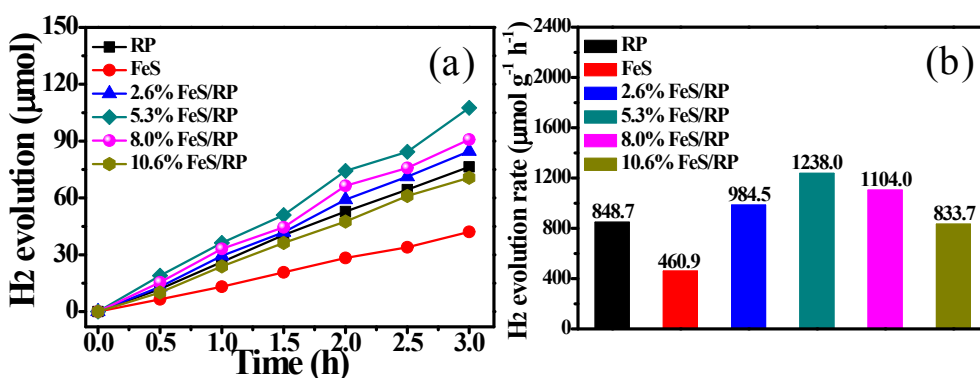

Fig. S4 (a) Photocatalytic H<sub>2</sub> generation amounts and (b) H<sub>2</sub> generation rates for different FeS/RP under light irradiation.

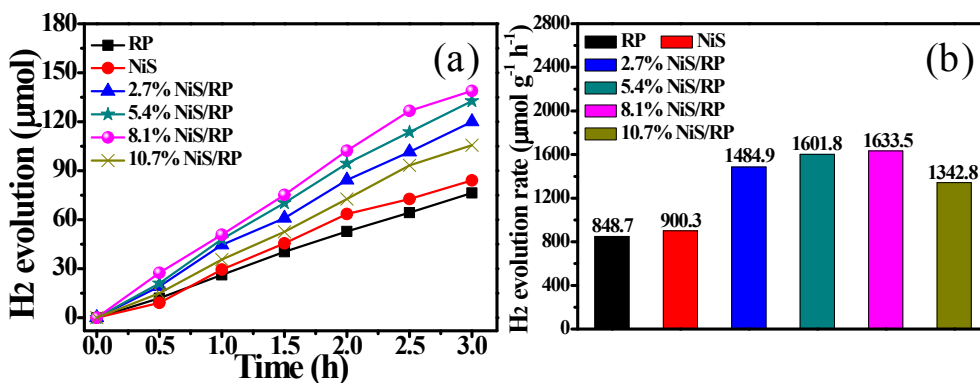

Fig. S5 (a) Photocatalytic H<sub>2</sub> generation amounts and (b) H<sub>2</sub> generation rates for different NiS/RP under light irradiation.

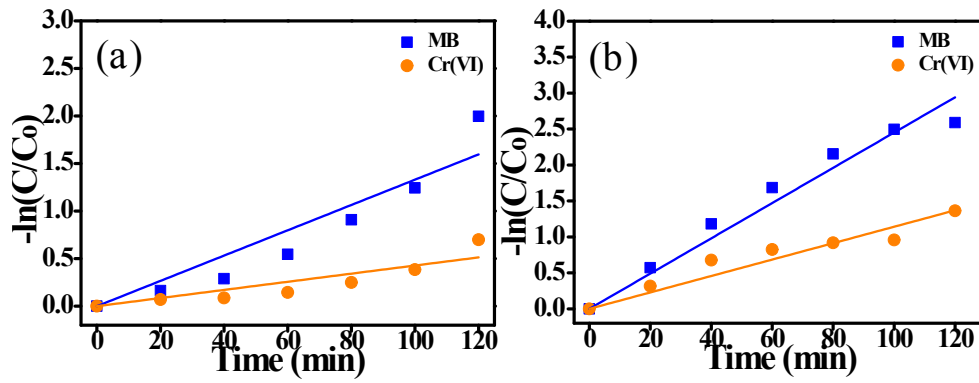

Fig. S6 The removal rate constant ( $K_{app}$ ) of Cr(VI) and MB over (a) pure RP and (b) 5.4% NiSe<sub>2</sub>/RP composite.

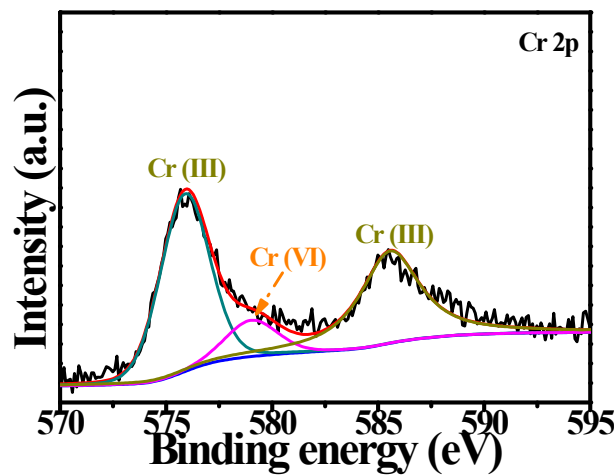

Fig. S7 High resolution XPS spectra of Cr on the surface of 5.4% NiSe<sub>2</sub>/RP composite after the photocatalytic reaction.<sup>1-3</sup>

The electron lifetime ( $\tau_n$ ) of the as-prepared photoanodes can be calculated from the Bode phase plots according to the following Equation S1:<sup>4</sup>

$$\tau_n = \frac{1}{2\pi f_{\max}} \quad (S1)$$

Where,  $\tau_n$  and  $f_{\max}$  is the electron lifetime and the maximum frequency value, respectively.

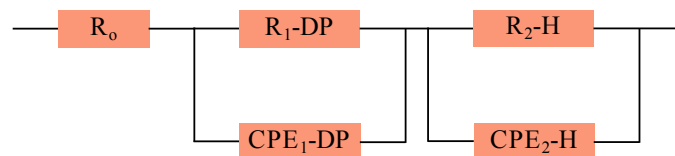

Fig. S8 The equivalent circuit model of the Nyquist plots.

As shown in Fig. S9a, the photocurrent density of NiSe<sub>2</sub> photoanode is about 9.8 uA/cm<sup>2</sup>, which is lower than that of 5.4% NiSe<sub>2</sub>/RP (16.8 uA/cm<sup>2</sup>). Besides, Fig. S9b illustrates that pure NiSe<sub>2</sub> has a low resistance compared to RP and 5.4% NiSe<sub>2</sub>/RP composite, which may be due to good conductivity of NiSe<sub>2</sub> itself.

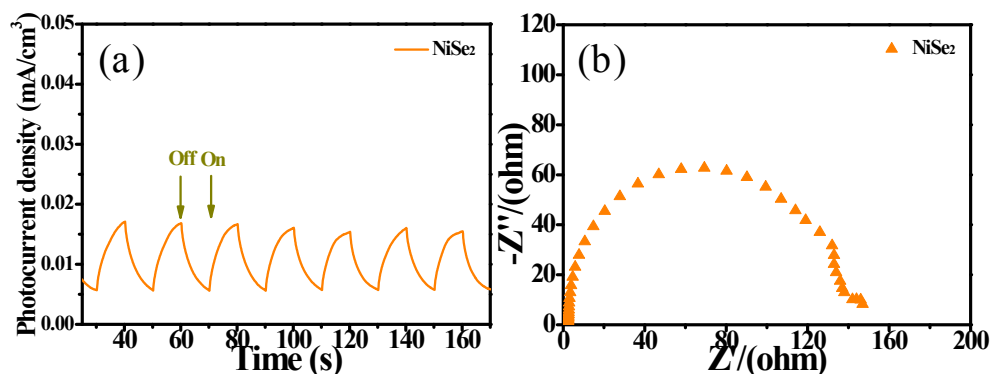

Fig. S9 (a) Transient photocurrent density and (b) EIS curves of pure NiSe<sub>2</sub>.

According to the fitted results of time-resolved transient PL decay curves, the PL average decay lifetime ( $\tau$ ) of the obtaining sample is calculated by the following Eq. S2:<sup>5</sup>

$$\tau = \tau_1 A_1 + \tau_2 A_2 \quad (S2)$$

Where,  $\tau$  is the average decay lifetime,  $\tau_1$  and  $A_1$  as well as  $\tau_2$  and  $A_2$  are the fast and minority-slow decay component, respectively.

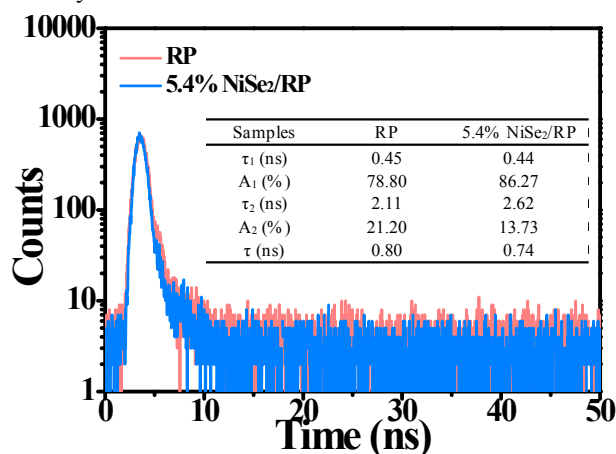

Fig. S10 Time-resolved PL decay spectra and calculated average lifetime of pristine RP and 5.4% NiSe<sub>2</sub>/RP heterostructure.

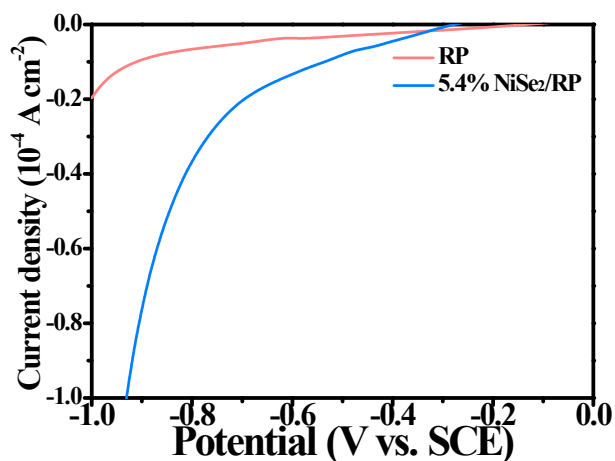

Fig. S11 The HER polarization curves of RP and NiSe<sub>2</sub>/RP photoanode.

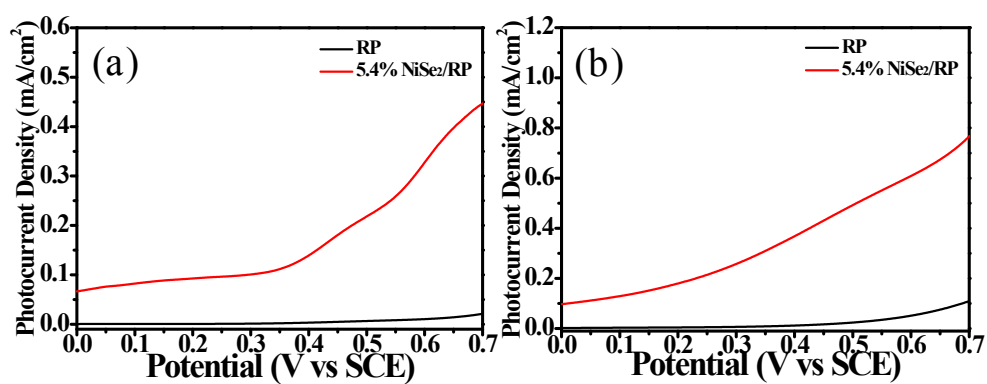

Fig. S12 Linear sweep voltammetry for RP and 5.4% NiSe<sub>2</sub>/RP measured in (a) 0.5 M Na<sub>2</sub>SO<sub>4</sub> as well as (b) in 0.35 M Na<sub>2</sub>S and 0.25 M Na<sub>2</sub>SO<sub>3</sub> solution under solar light irradiation.

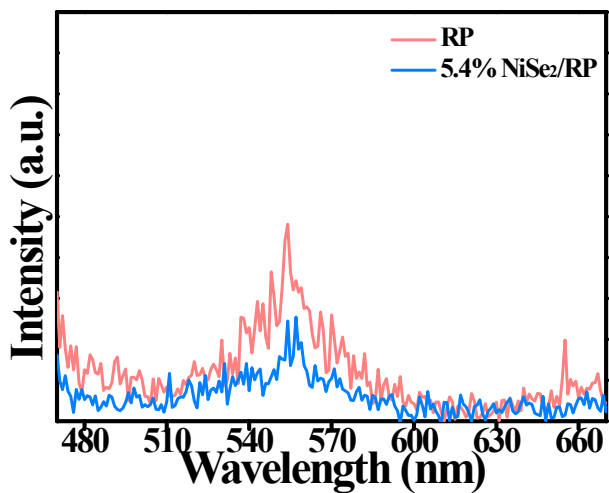

Fig. S13 PL spectra of RP and 5.4% NiSe<sub>2</sub>/RP composite.

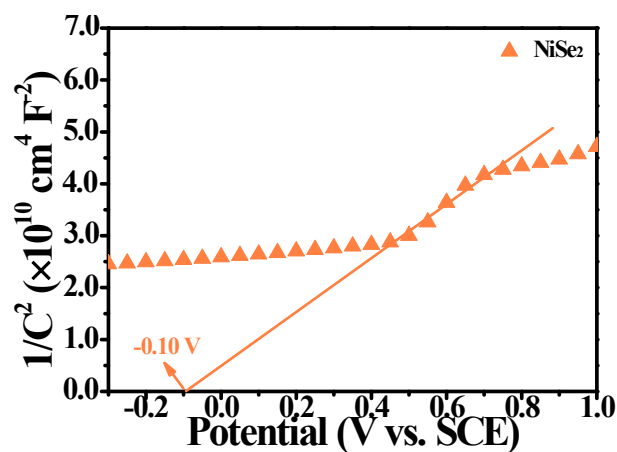

Fig. S14 Mott-Schottky plot of pure NiSe<sub>2</sub>.

The electron-transfer number ( $n$ ) is determined by a rotating ring-disk electrode (RRDE) electrochemical measurement including a glassy carbon disk with 5.4% NiSe<sub>2</sub>/RP sample ( $\Phi$ :5.61 mm, disk area: 0.247 cm<sup>2</sup>, ring area: 0.185 cm<sup>2</sup>), Pt ring and Ag/AgCl as reference electrode, based on the following Equation S3:6

$$n = \frac{4I_{disk}}{I_{disk} + \frac{I_{ring}}{N}} \quad (S3)$$

Where  $N$  is the RRDE collection efficiency, measured to be 0.39,  $I_{ring}$  and  $I_{disk}$  are the ring and disk current. In general, at the ring potential of -0.3 V, the trace amount of oxygen species such  $\cdot O_2^-$ , H<sub>2</sub>O<sub>2</sub> and  $\cdot OH$  will be generated. Therefore, we detect this potential to determine the formation of H<sub>2</sub>O<sub>2</sub>.

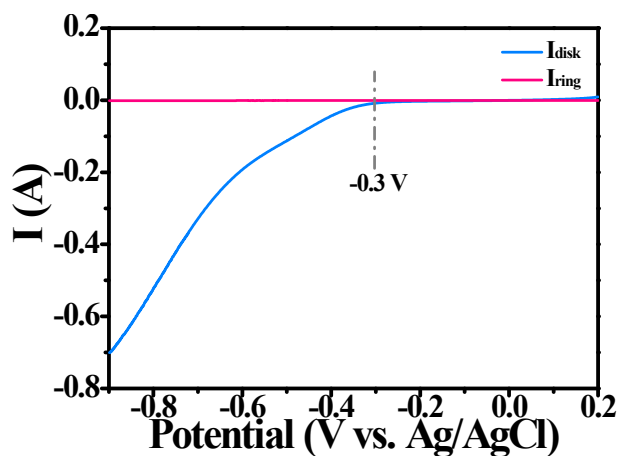

Fig. S15 The I-V curve of 5.4% NiSe<sub>2</sub>/RP composite based on rotating ring-disk electrode (RRDE) electrochemical measurement.



**Table S1.** The BET specific surface areas of different samples.

| Samples                    | $S_{\text{BET}}$ ( $\text{m}^2/\text{g}$ ) | Average pore size (nm) | Pore volume ( $\text{cm}^3/\text{g}$ ) |
|----------------------------|--------------------------------------------|------------------------|----------------------------------------|
| RP                         | 13.6                                       | 0.02                   | 3.09                                   |
| 5.4% NiSe <sub>2</sub> /RP | 13.2                                       | 0.02                   | 3.08                                   |
| NiSe <sub>2</sub>          | 22.6                                       | 3.87                   | 0.16                                   |

**Table S2.** Recent reports on RP-based heterojunction photocatalysts for H<sub>2</sub> generation.

| Photocatalyst system               | Sacrificial agent                                 | Light source                                 | Activity/ $(\mu\text{mol}\cdot\text{g}^{-1}\cdot\text{h}^{-1})$ | Ref.      |
|------------------------------------|---------------------------------------------------|----------------------------------------------|-----------------------------------------------------------------|-----------|
| 5.4% NiSe <sub>2</sub> /RP         | Na <sub>2</sub> S/Na <sub>2</sub> SO <sub>3</sub> | 300 W Xe lamp                                | 1968.8                                                          | This work |
| 8.1% NiS/RP                        | Na <sub>2</sub> S/Na <sub>2</sub> SO <sub>3</sub> | 300 W Xe lamp                                | 1633.5                                                          | This work |
| 5.3% FeS/RP                        | Na <sub>2</sub> S/Na <sub>2</sub> SO <sub>3</sub> | 300 W Xe lamp                                | 1230.8                                                          | This work |
| Crystalline RP                     | Methanol with 1wt%                                | 300 W Xe lamp with a                         | 19.2                                                            | 7         |
|                                    | Pt as cocatalyst                                  | 400 nm cutoff filter                         |                                                                 |           |
| Fibrous phase RP                   | Methanol with 1wt%                                | 300 W Xe lamp with a                         | 633.0-684.0                                                     | 8         |
|                                    | Pt as cocatalyst                                  | 420 nm cutoff filter                         |                                                                 |           |
| Au/RP                              | TEOA                                              | 300 W Xe lamp with a<br>420 nm cutoff filter | 189.4                                                           | 9         |
| Cu/RP                              | TEOA                                              | 300 W Xe lamp with a<br>420 nm cutoff filter | 225.8                                                           | 9         |
| Ni <sub>2</sub> P/RP               | TEOA                                              | 300 W Xe lamp with a<br>420 nm cutoff filter | 240.93                                                          | 10        |
| TiO <sub>2</sub> /RP               | Methanol                                          | 300 W Xe lamp with a<br>420 nm cutoff filter | 276.5                                                           | 11        |
| RP/g-C <sub>3</sub> N <sub>4</sub> | TEOA with 1wt% Pt<br>as cocatalyst                | 300 W Xe lamp with a<br>420 nm cutoff filter | 1691.0                                                          | 12        |
| GO/RP                              | TEOA                                              | 150 W Xe lamp with a<br>420 nm cutoff filter | 65.0                                                            | 13        |
| Ni(OH) <sub>2</sub> /RP            | Methanol with 1wt%                                | 300 W Xe lamp with a                         | 33.0                                                            | 14        |

|                                                      |                  |                                              |       |    |
|------------------------------------------------------|------------------|----------------------------------------------|-------|----|
|                                                      | Pt as cocatalyst | 400 nm cutoff filter                         |       |    |
| g-C <sub>3</sub> N <sub>4</sub> /RP/MoS <sub>2</sub> | TEOA             | 300 W Xe lamp with a<br>420 nm cutoff filter | 859.7 | 15 |

**Table S3.** The equivalent circuit parameters for RP and NiSe<sub>2</sub>/RP photoanode.

| Sample                | Solution           | Space charge layer      |                           |                        | Double charge layer    |                           |                        |
|-----------------------|--------------------|-------------------------|---------------------------|------------------------|------------------------|---------------------------|------------------------|
|                       | R <sub>s</sub> (Ω) | R <sub>1</sub> -DP (kΩ) | CPE <sub>1</sub> -DP (μF) | Electron lifetime (μs) | R <sub>2</sub> -DP (Ω) | CPE <sub>2</sub> -DP (μF) | Electron lifetime (ms) |
| RP                    | 2.1                | 15.2                    | 4.5                       | 34.3                   | 33.2                   | 13.9                      | 3.4                    |
| NiSe <sub>2</sub> /RP | 2.7                | 13.4                    | 14.3                      | 74.1                   | 96.9                   | 6.7                       | 15.7                   |

**Table S4.** Photocurrent density-applied potential for RP and 5.4% NiSe<sub>2</sub>/RP photoanode with and without the hole sacrificial agent.

| Potential (V vs SCE) | <i>J</i> (μA/cm <sup>2</sup> , Na <sub>2</sub> SO <sub>4</sub> ) |                            | <i>J</i> (μA/cm <sup>2</sup> , Na <sub>2</sub> S/Na <sub>2</sub> SO <sub>3</sub> ) |                            |
|----------------------|------------------------------------------------------------------|----------------------------|------------------------------------------------------------------------------------|----------------------------|
|                      | RP                                                               | 5.4% NiSe <sub>2</sub> /RP | RP                                                                                 | 5.4% NiSe <sub>2</sub> /RP |
| <b>0.05</b>          | 0.491                                                            | 76.05                      | 2.778                                                                              | 111.8                      |
| <b>0.1</b>           | 0.536                                                            | 82.35                      | 3.404                                                                              | 129.3                      |
| <b>0.15</b>          | 0.588                                                            | 88.56                      | 3.946                                                                              | 151.5                      |
| <b>0.2</b>           | 0.671                                                            | 92.65                      | 4.532                                                                              | 179.9                      |
| <b>0.25</b>          | 0.481                                                            | 96.3                       | 5.377                                                                              | 214.5                      |
| <b>0.3</b>           | 1.246                                                            | 100.8                      | 6.712                                                                              | 257.7                      |
| <b>0.35</b>          | 2.015                                                            | 111.7                      | 8.8                                                                                | 309.7                      |
| <b>0.4</b>           | 3.241                                                            | 139.2                      | 11.98                                                                              | 368.1                      |
| <b>0.45</b>          | 4.843                                                            | 180.6                      | 16.77                                                                              | 430.5                      |
| <b>0.5</b>           | 6.558                                                            | 218.1                      | 23.96                                                                              | 492.2                      |
| <b>0.55</b>          | 8.264                                                            | 258.9                      | 34.87                                                                              | 551.1                      |
| <b>0.6</b>           | 10.38                                                            | 327.4                      | 51.26                                                                              | 608.6                      |
| <b>0.65</b>          | 14.11                                                            | 397.4                      | 75.46                                                                              | 674.1                      |
| <b>0.7</b>           | 21.09                                                            | 446.7                      | 109.3                                                                              | 766.3                      |

## References

- 1 H. Fida, S. Guo and G. K. Zhang, *J. Colloid Interface Sci.*, 2015, **442**, 30-38.
- 2 J. Matusik and T. Bajda, *J. Colloid. Interface Sci.*, 2013, **398**, 74-81.
- 3 X. Meng, G. Zhang and N. Li, *Chem. Eng. J.*, 2016, **314**, 249-256.
- 4 H. Wang, Y. H. Liang, L. Liu, J. S. Hu, P. Wu and W. Q. Cui, *Appl. Catal. B-Environ.*, 2017, **208**, 22-34.
- 5 W. T. Bi, L. Zhang, Z. T. Sun, X. G. Li, T. Jin, X. J. Wu, Q. Zhang, Y. Luo, C. Z. Wu and Y. Xie, *ACS Catal.*, 2016, **6**, 4253-4257.
- 6 W. J. Zhang, Y. Hu, C. Z. Yan, D. C. Hong, R. P. Chen, X. L. Xue, S. Y. Yang, Y. X. Tian, Z. X. Tie and Z. Jin, *Nanoscale*, 2019, **11**, 9053-9060.
- 7 F. Wang, W. K. H. Ng, J. C. Yu, H. J. Zhu, C. H. Li, L. Zhang, Z. F. Liu and Q. Li, *Appl. Catal. B-Environ.*, 2012, **111**, 409-414.
- 8 Z. F. Hu, L. Y. Yuan, Z. F. Liu, Z. R. Shen and J. C. Yu, *Angew. Chem.*, 2016, **128**, 9732-9737.
- 9 L. L. Qi, K. Y. Dong, T. Zeng, J. Y. Liu, J. Fan, X. Y. Hu, W. L. Jia and E. Z. Liu, *Cataly. Today*, 2018, **314**, 42-51.
- 10 E. Z. Liu, L. L. Qi, J. B. Chen, J. Fan and X. Y. Hu, *Mater. Res. Bull.*, 2019, **115**, 27-36.
- 11 J. Wang, D. K. Zhang, J. K. Deng and S. J. Chen, *J. Colloid. Interf. Sci.*, 2018, **516**, 215-223.
- 12 W. J. Wang, G. Y. Li, T. C. An, D. K. L. Chan, J. C. Yu and P. K. Wong, *Appl. Catal. B-Environ.*, 2018, **238**, 126-135.
- 13 W. B. Li, Y. P. Zhang, G. D. Tian, S. Y. Xie, Q. Q. Xu, L. Wang and J. M. Tian, *J. Mol. Catal. A-Chem.*, 2016, **423**, 356-364.
- 14 H. F. Dang, X. F. Dong, Y. C. Dong, H. B. Fan and Y. F. Qiu, *RSC. Adv.*, 2014, **4**, 44823-44826.
- 15 H. Zhao, S. N. Sun, Y. Wu, P. P. Jiang and Y. M. Dong, *Carbon*, 2017, **119**, 56-61.
